# Supplementary material for: Highly efficient optogenetic cell ablation in C. elegans using membrane-targeted miniSOG
Source: PubMed Central journal article supplement (PMC4748272; doi:10.1038/srep21271), 2016-02-10
Supplement: srep21271-s1.pdf [file srep21271-s1.pdf]

# Highly efficient optogenetic cell ablation in *C. elegans* using membrane-targeted miniSOG

Suhong Xu\* and Andrew D. Chisholm\*

Division of Biological Sciences, Section of Cell and Developmental Biology, University of California, San Diego, 9500 Gilman Drive, La Jolla, CA 92093

\*Correspondence to: [suhongxu@gmail.com](mailto:suhongxu@gmail.com) (S.X.) and [chisholm@ucsd.edu](mailto:chisholm@ucsd.edu) (A.D.C.)

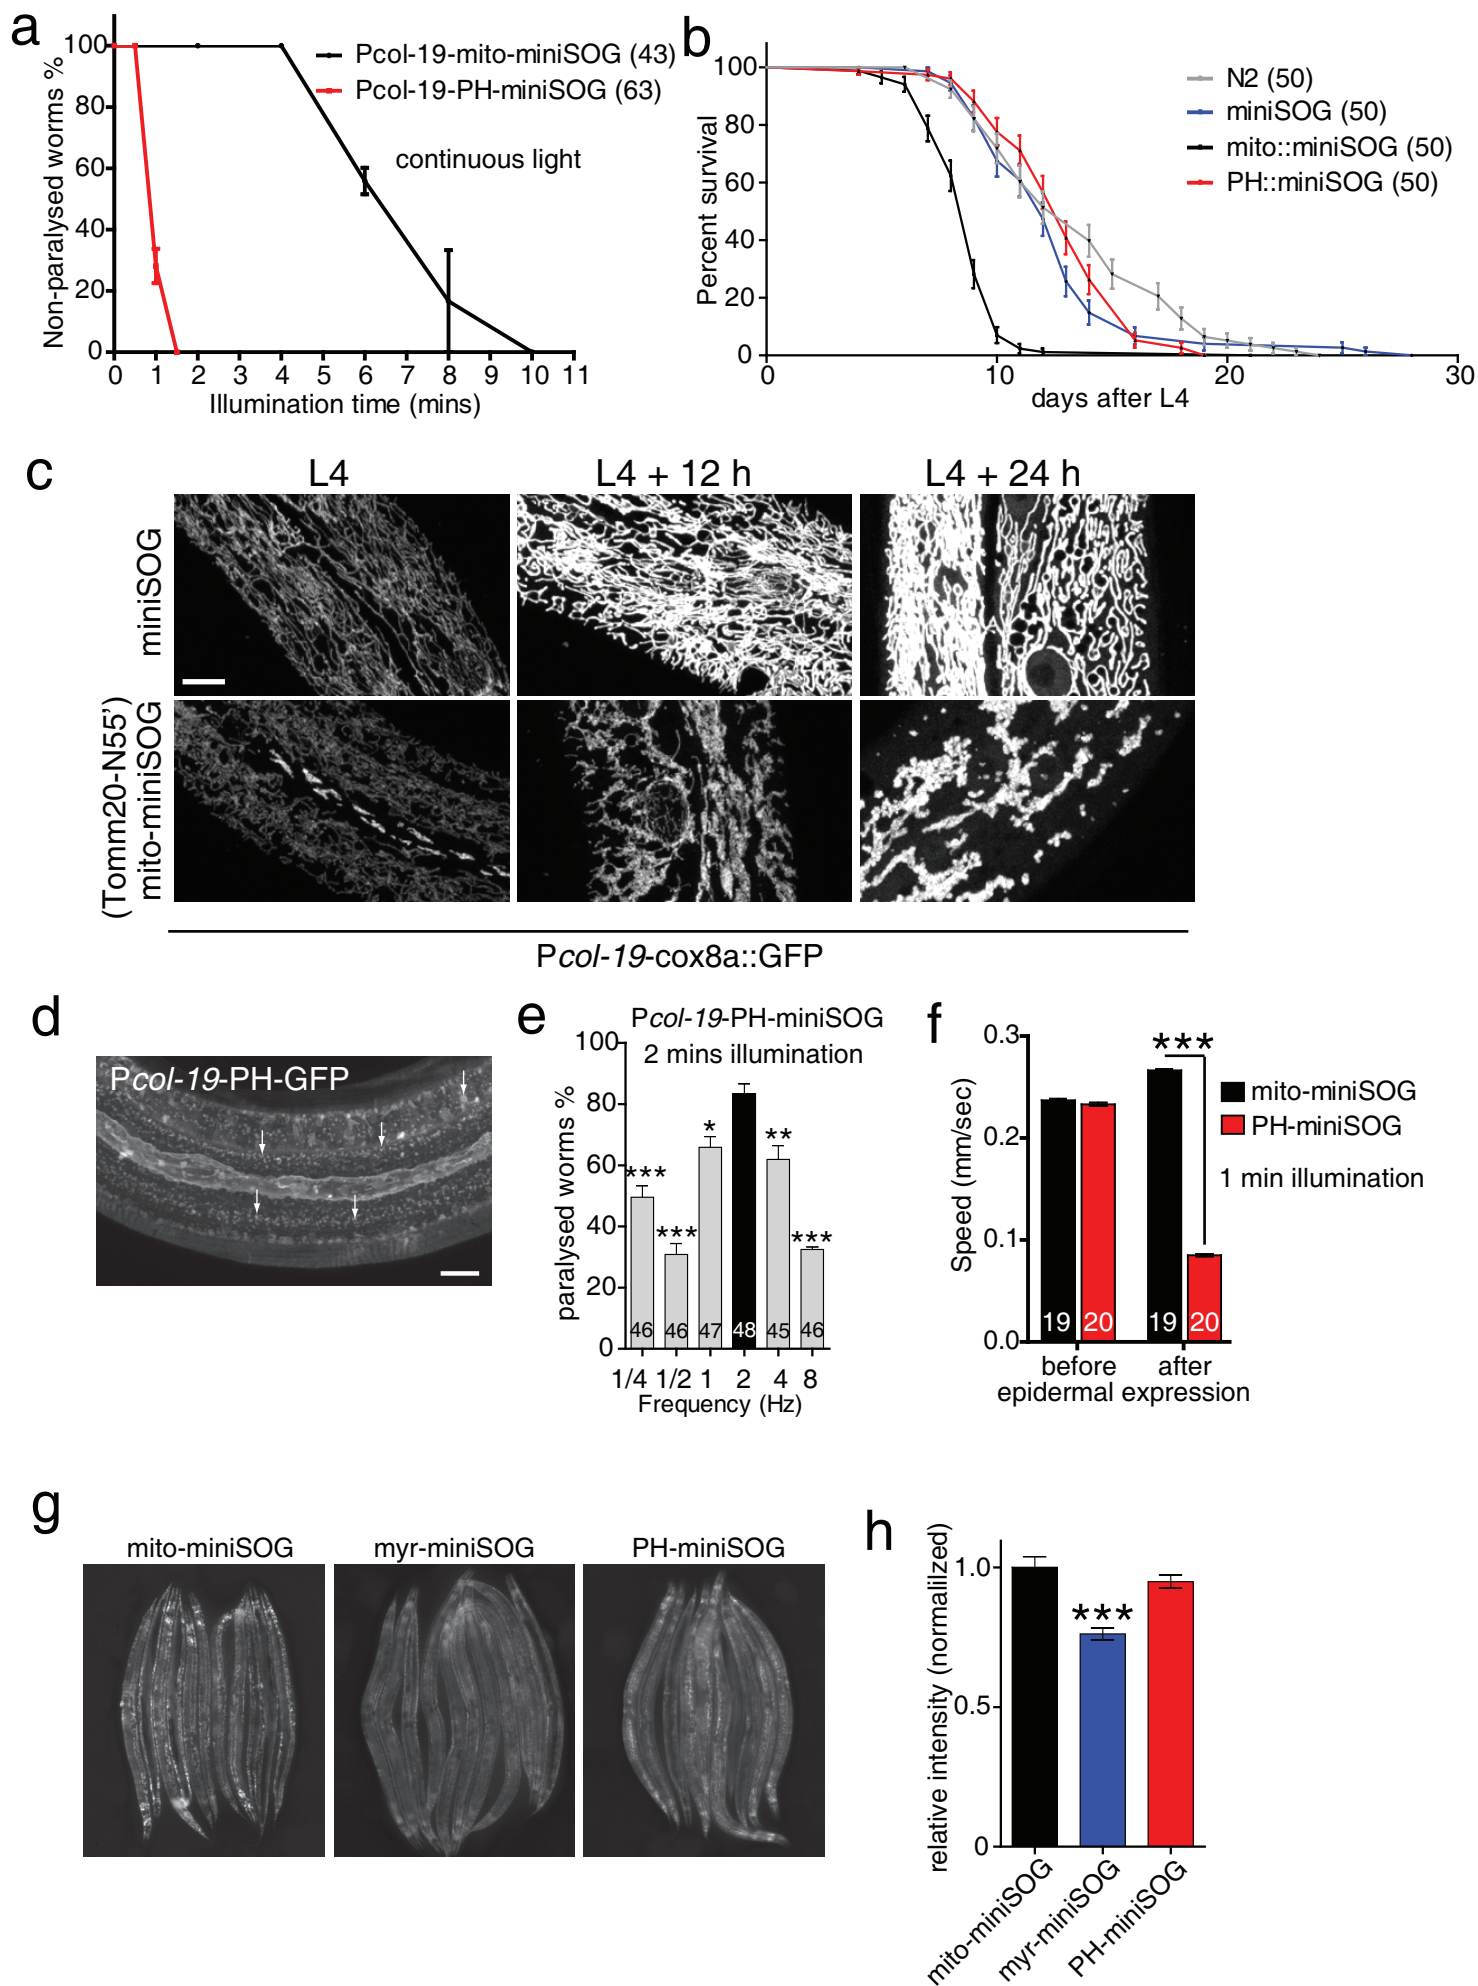

Figure S1

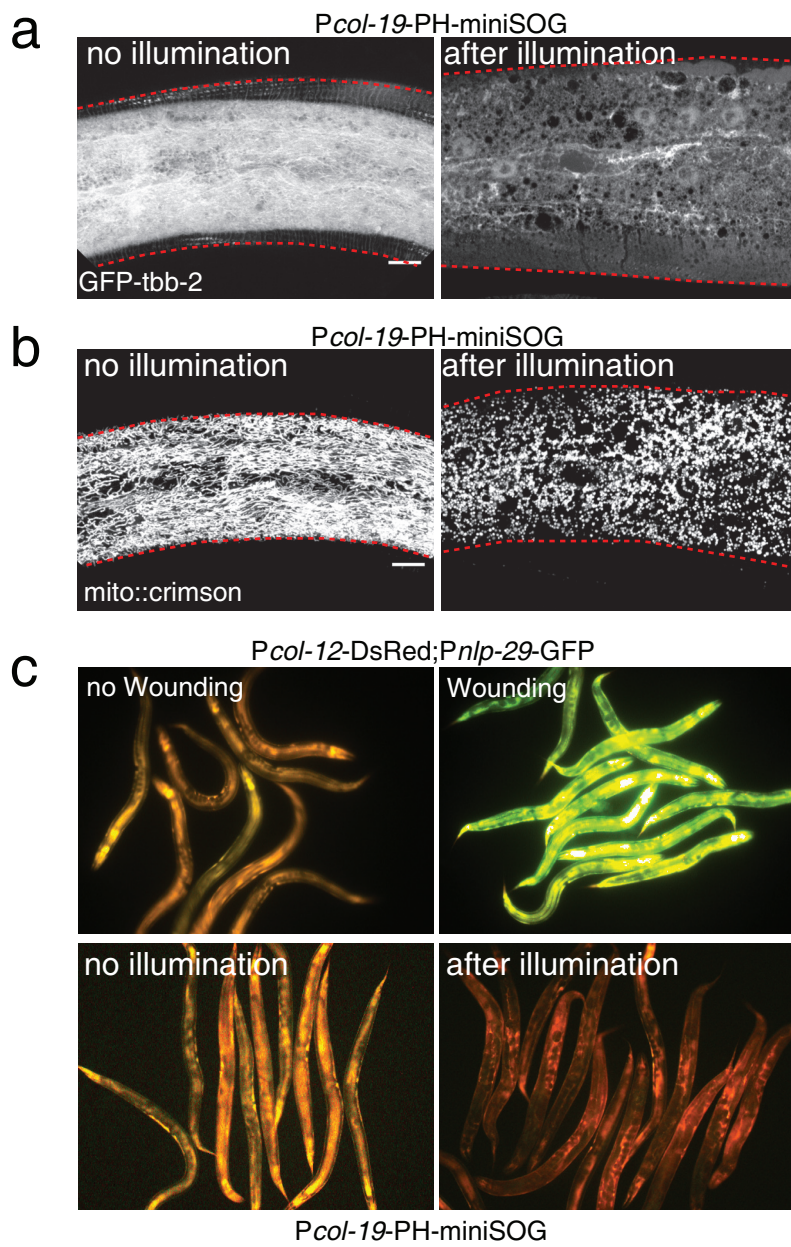

Figure S2

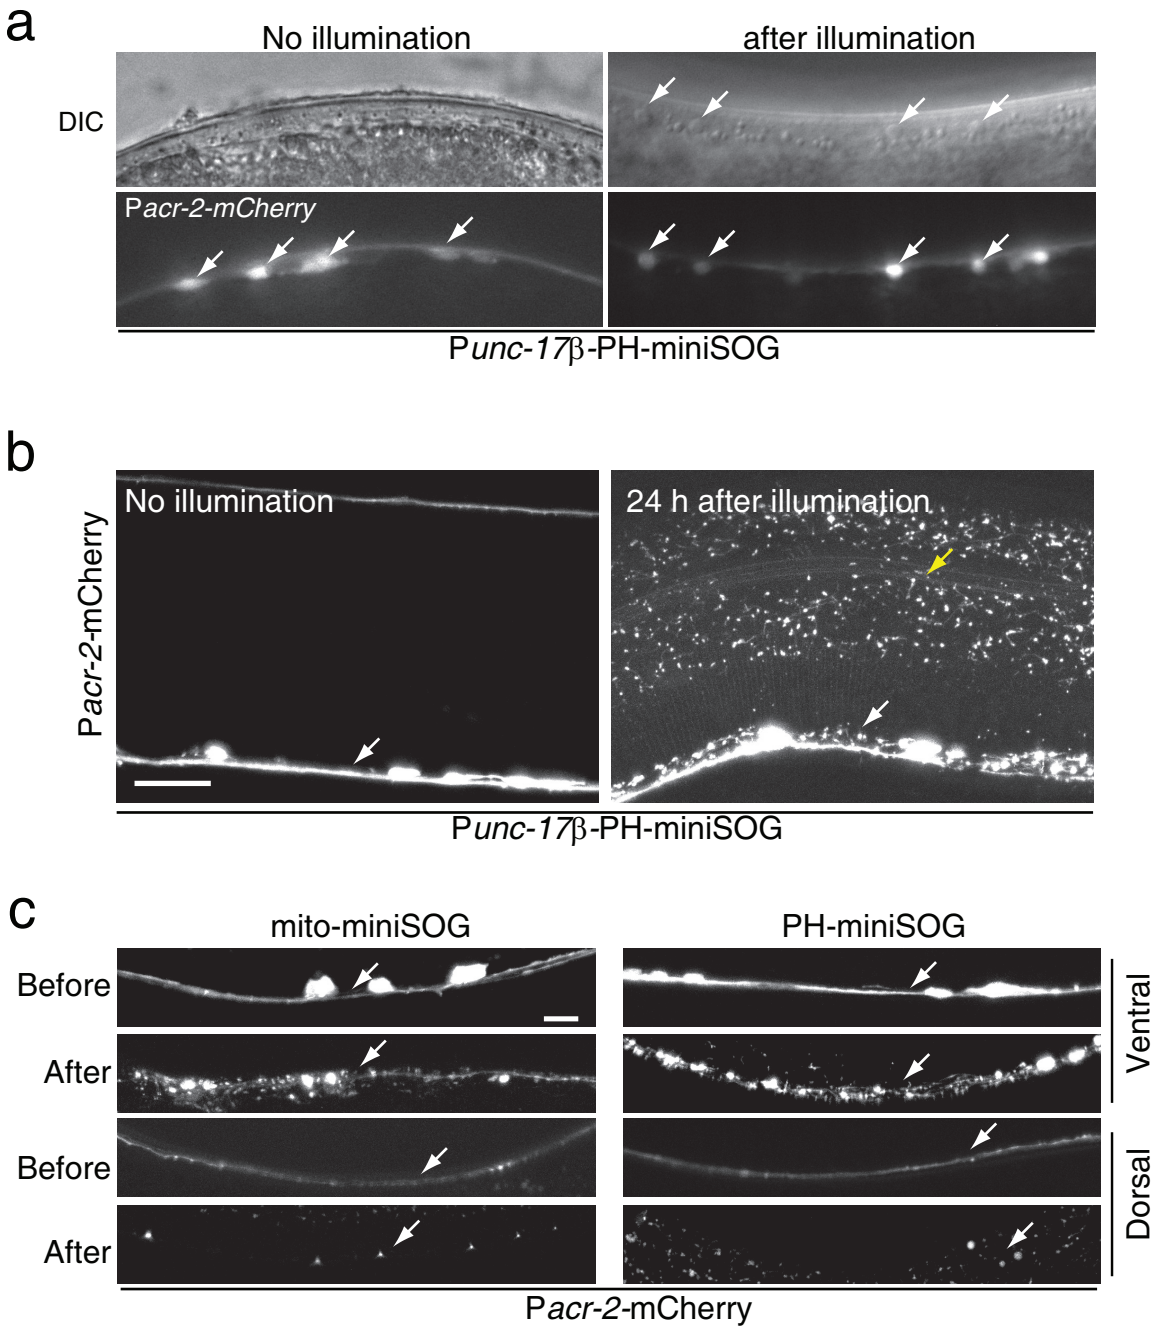

Figure S3

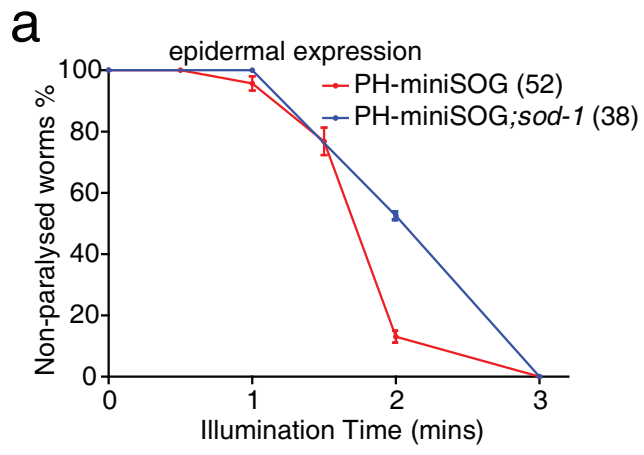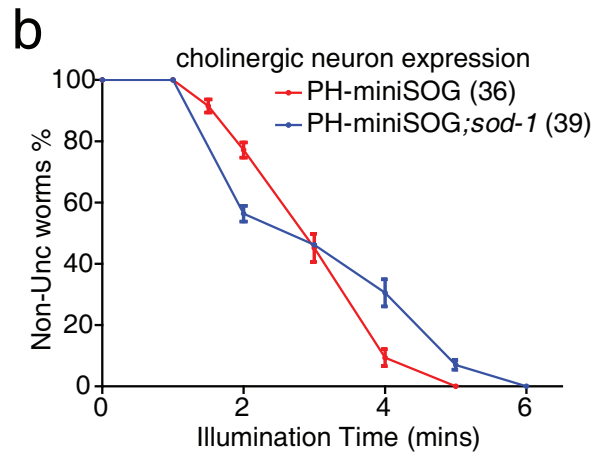

Figure S4

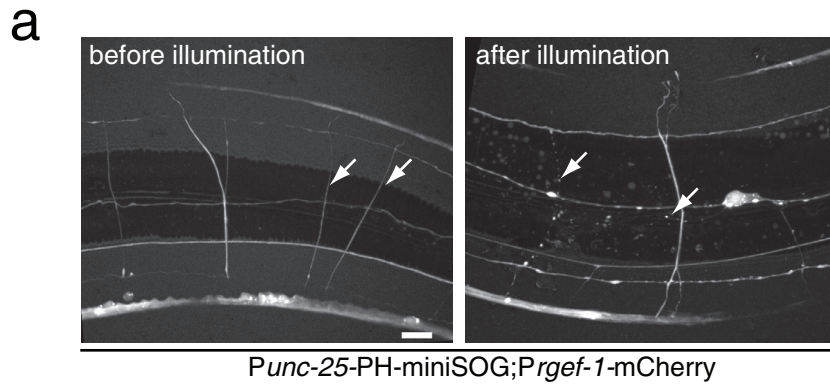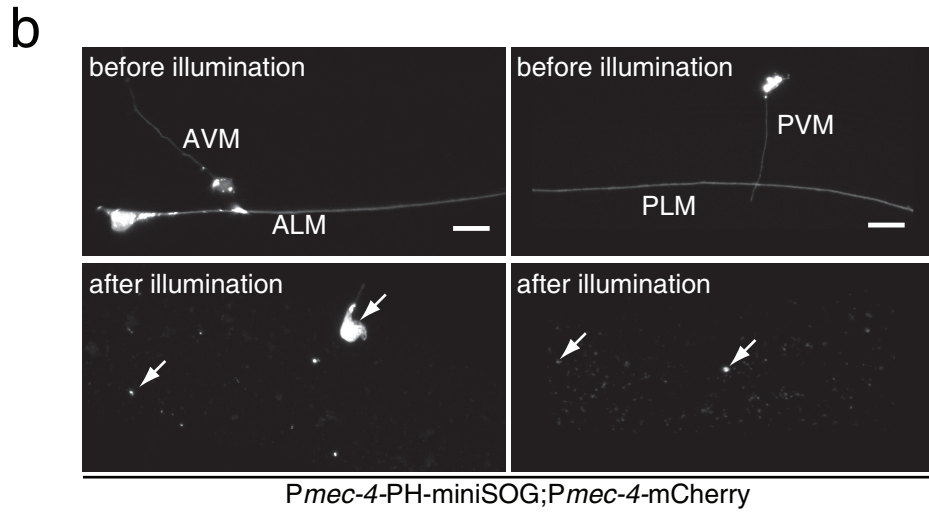

Figure S5

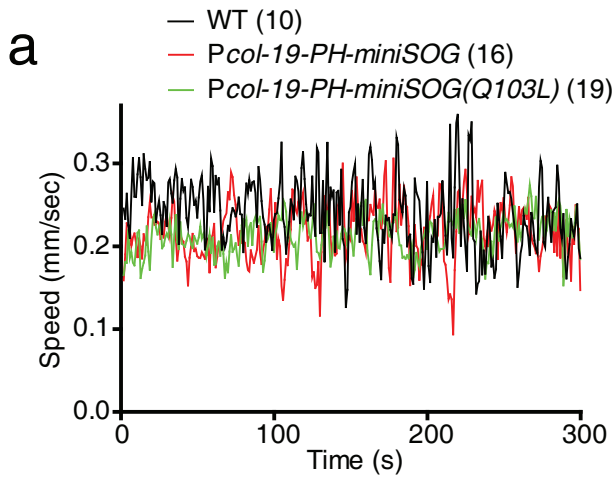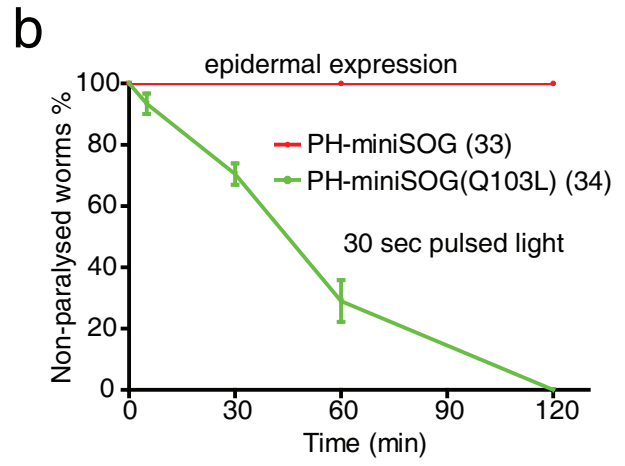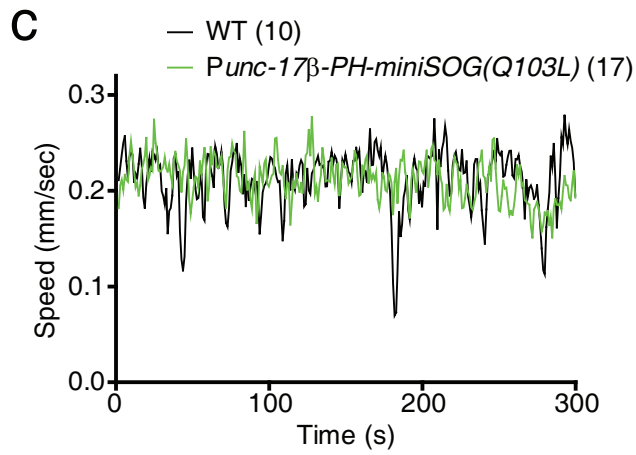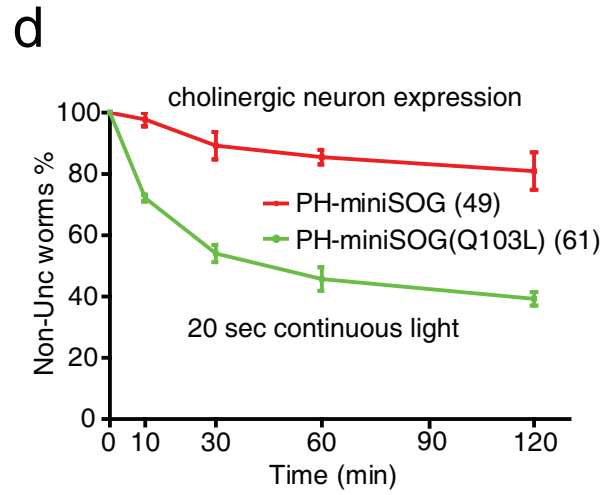

Figure S6

## Supplemental Information

**Table S1. New miniSOG transgenic strains and plasmids**

| Cell types               | Strains             | Genotype/Transgenes <sup>1</sup>                             | Plasmid <sup>2</sup>    | Concentration of miniSOG constructs |
|--------------------------|---------------------|--------------------------------------------------------------|-------------------------|-------------------------------------|
| Epidermis                | CZ16052             | <i>Pcol-19-miniSOG (juEx4532)</i>                            | pCZGY2137               | 10 ng/μl                            |
|                          | CZ16855             | <i>Pcol-19-cox8-miniSOG(juEx4973)</i>                        | pCZGY2136               | 10 ng/μl                            |
|                          | CZ16054             | <i>Pcol-19-mito-miniSOG (juEx4534)</i>                       | pCZGY2138               | 10 ng/μl                            |
|                          | CZ23271             | <i>Pcol-19-myr-miniSOG (juEx7095)</i>                        | pCZGY2847               | 10 ng/μl                            |
|                          | CZ16493             | <i>Pcol-19-PH-miniSOG (juEx4771)</i>                         | pCZGY2141               | 10 ng/μl                            |
|                          | CZ16236             | <i>Pcol-19-PH-miniSOG/Pcol-19-tdTomato (juEx400)</i>         | pCZGY2141/<br>pCZGY1575 | 10 ng/μl of each                    |
|                          | CZ23277             | <i>Pcol-19-PH-miniSOG(Q103L) (juEx7101)</i>                  | pCZGY2850               | 10 ng/μl                            |
| Body wall muscle         | CZ15071             | <i>Pmyo-3-mito-miniSOG/Pmyo-3-mCherry (juEx4076)</i>         | pCZGY1555/<br>pCZGY872  | 1 ng/μl of each                     |
|                          | CZ22703             | <i>Pmyo-3-PH-miniSOG/Pmyo-3-mCherry (juEx6916)</i>           | pCZGY2838/<br>pCZGY872  | 5 ng/μl of each                     |
| Cholinergic motor neuron | CZ15033/<br>CZ15844 | <i>Punc-17β-mito-miniSOG/Pacr-2-mCherry (juEx385)</i>        | pCZGY1558/<br>pCZGY847  | 50 ng/μl of each                    |
|                          | CZ23273             | <i>Punc-17β-myr-miniSOG/Pacr-2-mCherry (juEx7097)</i>        | pCZGY2848/<br>pCZGY847  | 20 ng/μl of each                    |
|                          | CZ22692             | <i>Punc-17β-PH-miniSOG/ Pacr-2-mCherry (juEx6905)</i>        | pCZGY2844/<br>pCZGY847  | 20 ng/μl of each                    |
|                          | CZ23279             | <i>Punc-17β-PH-miniSOG(Q103L)/ Pacr-2-mCherry (juEx7103)</i> | pCZGY2851/<br>pCZGY847  | 20 ng/μl of each                    |
| GABAergic motor neuron   | CZ19758             | <i>Punc-25-mito-miniSOG/Punc-25-crimson (juEx5983)</i>       | pSK9/pSK10              | 50 ng/μl of each                    |
|                          | CZ22698             | <i>Punc-25-PH-miniSOG/Prgef-1-mCherry (juEx6911)</i>         | pCZGY2842/<br>pCZGY922  | 20 ng/μl of each                    |



|                                     |         |                                                          |                        |                  |
|-------------------------------------|---------|----------------------------------------------------------|------------------------|------------------|
| Interneuron                         | CZ14478 | <i>Pnmr-1-mito-miniSOG/Pnmr-1-mCherry (juEx3771)</i>     | pCZGY1552/<br>pCZGY903 | 50 ng/μl of each |
|                                     | CZ22695 | <i>Pnmr-1-PH-miniSOG/Pnmr-1-mCherry (juEx6908)</i>       | pCZGY2845/<br>pCZGY903 | 20 ng/μl of each |
| Touch neuron                        | CZ23283 | <i>Pmec-4-mito-miniSOG/Pmec-4-mCherry (juEx7107)</i>     | pCZGY2852/<br>pCZGY546 | 20 ng/μl of each |
|                                     | CZ23281 | <i>Pmec-4-PH-miniSOG/ Pmec-4-mCherry (juEx7105)</i>      | pCZGY2840/<br>pCZGY546 | 20 ng/μl of each |
| Microtubule and mitochondria marker | CZ21790 | <i>Pcol-19-GFP-tbb-2;Pcol-19-mito-crimson (juEx6578)</i> | pCZ899/pCZGY2160       | 10 ng/μl of each |

Notes:

1. Co-injection markers were *Pttx-3-GFP* or *Pttx-3-RFP* (50 ng/μl)

2. All miniSOG clones used DNA codons optimized for mammals <sup>1</sup>.

## Supplemental Figure Legends

### Figure S1. Comparison of the effects of mito-miniSOG and PH-miniSOG in epidermis

a. Quantitation of paralysis in epidermal mito-miniSOG and PH-miniSOG expressing animals immediately after continuous blue light illumination for the indicated period. All transgenes use *col-19* promoter. Numbers are the animals that were analyzed in four independent experiments.

b. Lifespan of wild type and miniSOG transgenic animals. Only mito-miniSOG transgenics displayed significantly reduced lifespan compared to the WT.  $p < 0.001$ , survival test, error: 95% CI.  $n = 50$  animals for each strain.

c. Mito-miniSOG disrupts the tubular structure of mitochondria in the epidermis during development. Representative confocal images of epidermal mitochondria (*Pcol-19-mito-GFP*) in transgenic animals expressing cytosolic miniSOG and mito-miniSOG at different stages. Scale, 10  $\mu\text{m}$ .

d. The PH domain targets fusion proteins to the epidermal cell membrane. Representative confocal image of PH-GFP expressed in the epidermis. Arrows indicate apical puncta. Scale, 10  $\mu\text{m}$ .

e. Quantitation of paralysis in *Pcol-19-PH-miniSOG* animals immediately after 2 min blue light illumination at different frequencies. Numbers are the animals that were analyzed in three independent experiments. \*,  $P < 0.05$ , \*\*,  $P < 0.01$ , \*\*\*,  $P < 0.001$ , One-way ANOVA.

f. Quantitation of locomotion velocity immediately after blue light illumination. *Pcol-19*-PH-miniSOG transgenic animals displayed significantly reduced speed compared to *Pcol-19*-mito-miniSOG transgenics. Numbers are the animals that were analyzed in 2 independent experiments. \*\*\*,  $P < 0.001$ , t-test.

g. Green fluorescence images of epidermal miniSOG transgenic animals. Scale, 250  $\mu\text{m}$ .

h. Quantitation of green fluorescence intensity in panel f. \*\*\*,  $P < 0.001$ , One way ANOVA. mito-miniSOG fluorescence intensity was normalized to 1.

**Figure S2. Membrane targeted miniSOG expressed in the epidermis causes cell disruption after blue light illumination.**

a. Animals expressing *Pcol-19*-PH-miniSOG the epidermis display disrupted microtubule structure (*Pcol-19*-GFP-TBB-2 marker) after 2 min blue light illumination. Red dashed lines indicate the outlines of the animal. Scale, 10  $\mu\text{m}$ .

b. Animals expressing PH-miniSOG in the epidermis display disrupted mitochondrial structure (*Pcol-19*-mito::crimson) after 2 min blue light illumination. Scale, 10  $\mu\text{m}$ .

c. PH-miniSOG activation in the epidermis does not induce antimicrobial peptide expression (*Pnlp-29*-GFP reporter *frls7*, containing *Pcol-12*-dsRed internal control). Top: needle wounding triggers *Pnlp-29*-GFP induction in the epidermis 4 h later. Bottom: PH-miniSOG expression in the epidermis paralyzed animals but did not induce *Pnlp-29*-GFP, 4 h after 2 min blue light illumination.

### **Figure S3 Effects of PH-miniSOG on cholinergic neuron morphology**

a. DIC and fluorescence images of *Punc-17 $\beta$* -PH-miniSOG transgenic animals before and 2 h after illumination (2 min and 2 Hz). Arrows indicate rounded-up soma in the VNC in the DIC images, and *Pacr-2-mCherry* in the fluorescence image.

b. Representative confocal images of *Pacr-2-mCherry*, *Punc-17 $\beta$* -PH-miniSOG before and 24 h after blue light illumination. White arrows indicate VNC and yellow arrowheads indicate mCherry aggregates in the epidermis. Scale, 10  $\mu$ m.

c. Representative confocal images of *Pacr-2-mCherry* before and 24 h after blue light illumination. Both mito-miniSOG and PH-miniSOG (under the control of *unc-17 $\beta$*  promoter) induce cholinergic neuron degeneration after blue light illumination. White arrows indicate VNC and DNC. Scale, 10  $\mu$ m.

### **Figure S4. Membrane targeted miniSOG-mediated cell killing is not enhanced in superoxide dismutase *sod-1* mutant**

a. Quantitation of paralysis in WT and *sod-1(tm776)* mutant animals expressing epidermal PH-miniSOG immediately after 2 Hz blue light illumination, for the indicated times. Note *sod-1* mutant does not enhance the paralysis of PH-miniSOG transgenic animals after blue light illumination.

b. Quantitation of Unc animals in WT and *sod-1(tm776)* mutant expressing PH-miniSOG immediately after 2 Hz blue light illumination for the indicated times. PH-miniSOG is under the control of *unc-17 $\beta$*  promoter. The *sod-1* mutant does not enhance the Unc phenotype of PH-miniSOG transgenic animals after blue light illumination.

**Figure S5 PH-miniSOG efficiently kills GABAergic motor neurons and touch neurons after blue light illumination.**

c. Pan-neuronal morphology (labeled by *Prgef-1-mCherry*) in *Punc-25*-PH-miniSOG transgenic animals before and 24h after 4 min blue light illumination. Note that PH-miniSOG activation kills motor neurons but not other nearby neurons. White arrows indicate motor neurons. Scale, 10  $\mu$ m.

d. PH-miniSOG expression in touch neurons caused ALM, AVM, PLM, and PVM cell degeneration 24 h after 4 min blue light illumination. White arrows indicate degenerated cells. Scale, 10  $\mu$ m.

**Figure S6. The Q103L miniSOG variant enhances cell ablation efficacy**

a. Animals expressing PH-miniSOG or PH-miniSOG (Q103L) in the epidermis were indistinguishable from wild type before blue light illumination. Quantitation of locomotion velocity of PH-miniSOG, PH-miniSOG (Q103L) transgenic and WT animals, using the multi worm tracker. Numbers are the animals that were analyzed.

b. Onset of paralysis in animals expressing epidermal PH-miniSOG or PH-miniSOG (Q103L), after 30 sec 2 Hz blue light illumination. Numbers are the animals that were analyzed in three independent experiments.

c. Animals expressing PH-miniSOG (Q103L) in the cholinergic motor neurons are superficially wild type prior to blue light illumination. Quantitation of locomotion velocity of *Punc-17β*-PH-miniSOG (Q103L) transgenic and N2 (WT) animals using the multi worm tracker. Numbers are the animals that were analyzed.

d. Onset of paralysis in animals expressing cholinergic PH-miniSOG and PH-miniSOG (Q103L) animals after 20 sec continuous blue light illumination. Numbers are the animals that were analyzed in three independent experiments.

### **Supplemental Movie Legends**

**Movie S1.** *Pcol-19*-miniSOG. With and without blue light illumination. These transgenic animals display normal locomotion before and after illumination. Time: min.

**Movie S2.** *Pcol-19*-mito-miniSOG. With and without blue light illumination. These transgenic animals display normal locomotion before illumination and are paralyzed immediately after 10 min blue light (2 Hz) illumination. Time: min.

**Movie S3.** *Pcol-19*-PH-miniSOG. With and without blue light illumination. These transgenic animals display normal locomotion before illumination and are paralysed immediately after 2 min blue light (2 Hz) illumination. Time: min.

**Movie S4.** *Pcol-19*-myr-miniSOG. With and without blue light illumination. These transgenic animals display normal locomotion before illumination and are paralyzed immediately after 4 min blue light (2 Hz) illumination. Time: min.

**Movie S5.** *Punc-17 $\beta$* -PH-miniSOG. With and without blue light illumination. These transgenic animals display normal locomotion before illumination and are Unc immediately after 3 min blue light (2 Hz) illumination. Time: min.

**Movie S6.** *Punc-25*-PH-miniSOG. With and without blue light illumination. These transgenic animals display normal locomotion and are Unc immediately after 4 mins blue light illumination. Time: min.

**Movie S7.** *Pmyo-3*-PH-miniSOG. With and without blue light illumination. These transgenic animals display normal locomotion before illumination and are paralyzed immediately after 4 min blue light (2 Hz) illumination. Time: min.

#### **References:**

- 1 Qi, Y. B., Garren, E. J., Shu, X., Tsien, R. Y. & Jin, Y. Photo-inducible cell ablation in *Caenorhabditis elegans* using the genetically encoded singlet oxygen generating protein miniSOG. *Proc Natl Acad Sci U S A* **109**, 7499-7504 (2012).
